# Supplementary material for: Research Priorities for Eight Areas of Adolescent Health in Low- and Middle-Income Countries
Source: PubMed Central journal article supplement — J Adolesc Health. 2016 Jul;59(1):50–60. doi: 10.1016/j.jadohealth.2016.03.016 (PMC5357763; doi:10.1016/j.jadohealth.2016.03.016), 2016-07
Supplement: mmc5.pdf [file mmc5.pdf]

| Appendix E. Top 10 research questions according to their total Research Priority Score, by research type |                                                                                                                                                                                                                                                                                                                                                                                                                                                                                                 |                       |                     |              |                      |              |                                       |                          |
|----------------------------------------------------------------------------------------------------------|-------------------------------------------------------------------------------------------------------------------------------------------------------------------------------------------------------------------------------------------------------------------------------------------------------------------------------------------------------------------------------------------------------------------------------------------------------------------------------------------------|-----------------------|---------------------|--------------|----------------------|--------------|---------------------------------------|--------------------------|
| Research type                                                                                            | Health area                                                                                                                                                                                                                                                                                                                                                                                                                                                                                     | Clarity score         | Answerability score | Impact score | Implementation score | Equity score | Total score (Research Priority Score) | Average Expert Agreement |
| <b>Descriptive epidemiology</b>                                                                          |                                                                                                                                                                                                                                                                                                                                                                                                                                                                                                 |                       |                     |              |                      |              |                                       |                          |
| 1                                                                                                        | Considering comprehensive theoretical models and variables from different levels/systems/contextes (e.g., Socio-ecological Model), which variables predict, at an individual or population level, the different patterns of physical activity in adolescents living in low- and middle-income countries?                                                                                                                                                                                        | Physical activity     | 91                  | 100          | 100                  | 100          | 100                                   | 98                       |
| 2                                                                                                        | What are treatment adherence rates, and what are the risk factors for non-adherence or default, among adolescents on long-term treatment for TB?                                                                                                                                                                                                                                                                                                                                                | Communicable diseases | 100                 | 94           | 97                   | 94           | 97                                    | 93                       |
| 3                                                                                                        | What is the incidence and burden of TB among younger (10-14y) and older (15-19y) adolescents in the world, by sex particularly among adolescents with HIV, and what proportion of the adolescents have drug resistant TB?                                                                                                                                                                                                                                                                       | Communicable diseases | 91                  | 100          | 91                   | 85           | 91                                    | 87                       |
| 4                                                                                                        | What are the true rates (based on empirical data not models) of mortality and DALYs lost from diarrhoeal disease and from lower respiratory tract infections in adolescents (10-14y and 15-19y) by sex, SES, rural/urban, by HIC/UMIC/LMIC/LIC, and by world region?                                                                                                                                                                                                                            | Communicable diseases | 91                  | 94           | 90                   | 88           | 94                                    | 85                       |
| 5                                                                                                        | What are the causes of anaemia among adolescent girls and how does this vary by region?                                                                                                                                                                                                                                                                                                                                                                                                         | Nutrition             | 98                  | 85           | 93                   | 92           | 93                                    | 87                       |
| 6                                                                                                        | What are the rates of development of anti-tuberculosis drug resistance in adolescents?                                                                                                                                                                                                                                                                                                                                                                                                          | Communicable diseases | 82                  | 100          | 91                   | 91           | 81                                    | 82                       |
| 7                                                                                                        | What are the global and regional levels and trends in physical activity (by type and degree) among adolescents over time and also by age, both at a population level (eg. repeated cross-sectional studies) and in the same individuals over time (ie. longitudinal studies) in LMICs?                                                                                                                                                                                                          | Physical activity     | 91                  | 91           | 95                   | 73           | 95                                    | 85                       |
| 8                                                                                                        | What are the risk factors contributing to adolescents' substance use in the different world regions?                                                                                                                                                                                                                                                                                                                                                                                            | Substance use         | 73                  | 86           | 91                   | 86           | 91                                    | 78                       |
| 9                                                                                                        | What are the knowledge, attitudes and beliefs about the benefits of physical activity among adolescents in low- and middle-income countries?                                                                                                                                                                                                                                                                                                                                                    | Physical activity     | 91                  | 91           | 82                   | 91           | 95                                    | 84                       |
| 10                                                                                                       | What are the relationships between early pregnancy and stunting, anaemia, and NCD risk (overweight, diabetes, hypertension)?                                                                                                                                                                                                                                                                                                                                                                    | Nutrition             | 89                  | 97           | 87                   | 89           | 79                                    | 84                       |
|                                                                                                          |                                                                                                                                                                                                                                                                                                                                                                                                                                                                                                 |                       |                     |              |                      |              |                                       |                          |
|                                                                                                          | <b>Descriptive epidemiology (mean)</b>                                                                                                                                                                                                                                                                                                                                                                                                                                                          |                       | <b>90</b>           | <b>94</b>    | <b>92</b>            | <b>89</b>    | <b>92</b>                             | <b>86</b>                |
| <b>Intervention: Discovery</b>                                                                           |                                                                                                                                                                                                                                                                                                                                                                                                                                                                                                 |                       |                     |              |                      |              |                                       |                          |
| 1                                                                                                        | What is the best (feasibility, cost, acceptability, effectiveness, sustainability) design of a school-based intervention that aims to engage and gain the support of students, parents and teachers for young people to take the recommended 60 minutes of physical activity daily, and to ensure that there are at least two physical education (PE) classes within schools per week, with at least 50% of the time for PE classes spent in moderate-to-vigorous intensity physical activity)? | Physical activity     | 70                  | 100          | 100                  | 100          | 100                                   | 94                       |
| 2                                                                                                        | What prevention and treatment services related to substance use are acceptable to adolescents?                                                                                                                                                                                                                                                                                                                                                                                                  | Substance use         | 95                  | 95           | 100                  | 100          | 95                                    | 95                       |
| 3                                                                                                        | Can a low cost rapid antigen test for diagnosis of streptococcal pharyngitis (which can lead to rheumatic heart disease) be developed that is suitable for use in low resource settings?                                                                                                                                                                                                                                                                                                        | NCD management        | 95                  | 95           | 86                   | 86           | 77                                    | 84                       |
| 4                                                                                                        | Is the use of electronic substitutes for nicotine delivery by adolescents a gateway or replacement mechanism for smoking?                                                                                                                                                                                                                                                                                                                                                                       | Substance use         | 91                  | 86           | 91                   | 91           | 73                                    | 80                       |
| 5                                                                                                        | What is the best design of an intervention with the central theme "Healthy Students Study Better" that aims to link the central concerns of parents and teachers for healthy lifestyles, including physical activity, to a better capacity for students to learn?                                                                                                                                                                                                                               | Physical activity     | 75                  | 90           | 90                   | 75           | 85                                    | 72                       |
| 6                                                                                                        | What are the most effective strategies for evaluating community-based interventions for reducing the burden of substance use among adolescents?                                                                                                                                                                                                                                                                                                                                                 | Substance use         | 91                  | 86           | 86                   | 86           | 82                                    | 82                       |
| 7                                                                                                        | Which theoretical and evidence-based framework should guide decision-making on the most effective strategies and the most relevant types/domains of physical activity to reduce physical inactivity among adolescents living in low- and middle-income countries?                                                                                                                                                                                                                               | Physical activity     | 95                  | 90           | 90                   | 85           | 72                                    | 75                       |
| 8                                                                                                        | What are the effectiveness and cost-effectiveness of an innovative intervention to reduce sedentary behaviour and promote leisure time physical activity that draws on a culturally relevant model?                                                                                                                                                                                                                                                                                             | Physical activity     | 80                  | 80           | 85                   | 85           | 85                                    | 68                       |
| 9                                                                                                        | When controlled for other socioeconomic factors, is TB disease during adolescence associated with lower earning potential, and/or higher prevalence or severity of depression, and/or higher prevalence of substance use?                                                                                                                                                                                                                                                                       | Communicable diseases | 85                  | 91           | 81                   | 72           | 84                                    | 70                       |
| 10                                                                                                       | What is the relationship between cognitive development and physical activity/exercise in children and adolescents?                                                                                                                                                                                                                                                                                                                                                                              | Physical activity     | 100                 | 90           | 85                   | 85           | 65                                    | 80                       |
|                                                                                                          |                                                                                                                                                                                                                                                                                                                                                                                                                                                                                                 |                       |                     |              |                      |              |                                       |                          |
|                                                                                                          | <b>Intervention: Discovery (mean)</b>                                                                                                                                                                                                                                                                                                                                                                                                                                                           |                       | <b>88</b>           | <b>90</b>    | <b>89</b>            | <b>87</b>    | <b>82</b>                             | <b>80</b>                |
| <b>Intervention: Development / Testing</b>                                                               |                                                                                                                                                                                                                                                                                                                                                                                                                                                                                                 |                       |                     |              |                      |              |                                       |                          |
| 1                                                                                                        | What would be the most cost-effective, affordable and feasible package of interventions for promotion of mental health and prevention of mental health disorders among adolescents?                                                                                                                                                                                                                                                                                                             | Mental health         | 92                  | 95           | 100                  | 92           | 86                                    | 88                       |
| 2                                                                                                        | What are the effects of daily physical education and recreation on total physical activity levels, physical fitness, cognitive development, and school performance among children and adolescents?                                                                                                                                                                                                                                                                                              | Physical activity     | 90                  | 95           | 95                   | 90           | 90                                    | 86                       |
| 3                                                                                                        | What is the best way to help adolescents to adhere to TB medication when they are also taking ARVs?                                                                                                                                                                                                                                                                                                                                                                                             | Communicable diseases | 88                  | 88           | 94                   | 94           | 90                                    | 84                       |

|    |                                                                                                                                                                                                                          |                                   |           |           |           |           |           |           |           |
|----|--------------------------------------------------------------------------------------------------------------------------------------------------------------------------------------------------------------------------|-----------------------------------|-----------|-----------|-----------|-----------|-----------|-----------|-----------|
| 4  | Can overall duration of TB treatment and/ or frequency of TB medication dosing be reduced to facilitate adherence and improve rates of treatment completion among adolescents?                                           | Communicable diseases             | 94        | 83        | 100       | 90        | 80        | 90        | 84        |
| 5  | What are effective interventions to prevent and treat mental health problems of adolescents that can be delivered at primary care level in LMICs?                                                                        | Mental health                     | 100       | 97        | 89        | 87        | 82        | 89        | 88        |
| 6  | What are the most cost-effective interventions to decrease multiple health-risk behaviours and conditions and promote healthy behaviours?                                                                                | Policy, health and social systems | 82        | 92        | 92        | 91        | 73        | 88        | 80        |
| 7  | Is TB screening at school registration in adolescents cost-effective?                                                                                                                                                    | Communicable diseases             | 88        | 88        | 90        | 90        | 83        | 88        | 82        |
| 8  | What works in co-producing (ie. working with young people to design) interventions to promote physical activity in young people from low and middle-income families?                                                     | Physical activity                 | 80        | 85        | 90        | 90        | 85        | 88        | 84        |
| 9  | What are effective interventions addressing self-harm/suicide in adolescent girls in LMICs?                                                                                                                              | Mental health                     | 97        | 87        | 97        | 79        | 76        | 87        | 82        |
| 10 | What is the efficacy and effectiveness of a screening instrument linked to a brief intervention for alcohol use among adolescents for use in primary care settings?                                                      | Substance use                     | 77        | 91        | 86        | 91        | 82        | 87        | 78        |
|    | <b>Intervention: Development/Testing (mean)</b>                                                                                                                                                                          |                                   | <b>89</b> | <b>90</b> | <b>93</b> | <b>89</b> | <b>83</b> | <b>90</b> | <b>84</b> |
|    | <b>Intervention: Implementation/Delivery</b>                                                                                                                                                                             |                                   |           |           |           |           |           |           |           |
| 1  | How best can the capacity of the education sector be improved to deliver high quality physical education programs within schools?                                                                                        | Physical activity                 | 89        | 100       | 100       | 94        | 94        | 98        | 93        |
| 2  | How does one best implement a sustainable, structured physical activity program for adolescents in schools and out of schools in LMICs?                                                                                  | Physical activity                 | 78        | 100       | 100       | 100       | 89        | 98        | 93        |
| 3  | What are the key barriers faced by adolescents to access TB and TB/HIV diagnostic and treatment services in high and low income countries, and how can these be overcome?                                                | Communicable diseases             | 100       | 97        | 100       | 90        | 97        | 97        | 95        |
| 4  | How best can parents, teachers, and policymakers be engaged in creating physical activity-friendly school environments for children and adolescents?                                                                     | Physical activity                 | 100       | 89        | 100       | 89        | 94        | 94        | 91        |
| 5  | What are scalable and sustainable approaches to improve physical activity in children and adolescents, particularly in low-to-middle income countries?                                                                   | Physical activity                 | 89        | 83        | 94        | 100       | 100       | 94        | 91        |
| 6  | What is the potential contribution of peer-led interventions for improving retention in care among adolescents with TB and/or HIV?                                                                                       | Communicable diseases             | 97        | 94        | 97        | 91        | 90        | 94        | 87        |
| 7  | How can effective local interventions for increasing physical activity in adolescents best be scaled up for national and cross-national implementation?                                                                  | Physical activity                 | 100       | 100       | 94        | 94        | 83        | 93        | 91        |
| 8  | Which programmatic interventions developed to improve adolescent retention in care and treatment adherence for other communicable diseases (i.e. HIV) would be useful for application in TB programs?                    | Communicable diseases             | 88        | 93        | 93        | 90        | 93        | 93        | 84        |
| 9  | What are adolescents' preferences for type of physical activities by community and the relationship of this to their cultural background?                                                                                | Physical activity                 | 89        | 94        | 94        | 89        | 89        | 92        | 84        |
| 10 | How effective and cost-effective is the integration of HIV and TB surveillance to enhance early detection and case management in adolescents?                                                                            | Communicable diseases             | 100       | 100       | 94        | 88        | 78        | 91        | 85        |
|    | <b>Intervention: Implementation/Delivery (mean)</b>                                                                                                                                                                      |                                   | <b>93</b> | <b>95</b> | <b>97</b> | <b>92</b> | <b>91</b> | <b>94</b> | <b>90</b> |
|    | <b>Health policy, health and social systems</b>                                                                                                                                                                          |                                   |           |           |           |           |           |           |           |
| 1  | What are the policy and/or environmental changes that influence physical activity among adolescents in low- and middle-income countries?                                                                                 | Physical activity                 | 100       | 100       | 100       | 94        | 94        | 98        | 96        |
| 2  | How best can physical exercise programs for children and adolescents be initiated in public health care systems?                                                                                                         | Physical activity                 | 89        | 94        | 89        | 89        | 89        | 90        | 82        |
| 3  | How can the policies of various sectors align and interact to promote physical activity and health in adolescents living in low- and middle-income countries?                                                            | Physical activity                 | 67        | 83        | 89        | 89        | 94        | 89        | 78        |
| 4  | How can mental health and psychosocial support (including identification, support and basic management of relevant conditions) be integrated with adolescent friendly services, general health, reproductive health etc? | Mental health                     | 91        | 91        | 94        | 79        | 71        | 86        | 74        |
| 5  | What are the barriers to adolescents with severe mental disorders receiving diagnosis, treatment and care?                                                                                                               | Mental health                     | 97        | 91        | 82        | 76        | 88        | 84        | 78        |
| 6  | What training, support and supervision will enable existing health workers to recognize, and provide basic treatment for common adolescent mental disorders?                                                             | Mental health                     | 94        | 97        | 91        | 76        | 65        | 84        | 80        |
| 7  | What is the role of social media/online advertising in adolescents' uptake of alcohol or tobacco?                                                                                                                        | Substance use                     | 90        | 90        | 85        | 80        | 80        | 84        | 80        |
| 8  | What is the extent of adolescents' access to and utilization of smoking cessation services in LMIC?                                                                                                                      | Substance use                     | 70        | 90        | 85        | 80        | 80        | 84        | 72        |
| 9  | To what extent do national health policies in LMICs address substance use by adolescents?                                                                                                                                | Substance use                     | 60        | 85        | 85        | 80        | 80        | 83        | 62        |
| 10 | What impact will the incorporation of mental health services into juvenile justice and child social-welfare systems have on outcomes for children in LMICs?                                                              | Mental health                     | 85        | 88        | 82        | 71        | 85        | 82        | 72        |
|    | <b>Health policy, health and social systems (mean)</b>                                                                                                                                                                   |                                   | <b>84</b> | <b>91</b> | <b>88</b> | <b>82</b> | <b>83</b> | <b>86</b> | <b>77</b> |
|    | <b>Overall (mean)</b>                                                                                                                                                                                                    |                                   | <b>89</b> | <b>92</b> | <b>92</b> | <b>88</b> | <b>86</b> | <b>90</b> | <b>83</b> |
